# Supplementary material for: Degradation of tetrabromobisphenol A in heat activated persulfate oxidation process
Source: Royal Society of Chemistry journal article supplement (doi:10.1039/c6ra02482c), 2016-01-01
Supplement: c6ra02482c1.pdf [file c6ra02482c1.pdf]

## Supplementary Data for

# Degradation of tetrabromobisphenol A in heat activated persulfate oxidation process

Hao Jin<sup>a</sup>, Deyang Kong<sup>b</sup>, Yuefei Ji<sup>a</sup>, Junhe Lu<sup>a\*</sup>, Quansuo Zhou<sup>a</sup>

<sup>a</sup> College of Resources and Environmental Sciences, Nanjing Agricultural University, Nanjing  
210095, China

<sup>b</sup> Nanjing Institute of Environmental Science, Ministry of Environmental Protection of PRC,  
Nanjing, 210042, China

Prepared for *RSC advances*

\* *Corresponding author.* Tel.: +86 25 84395164; fax: +86 25 84395164.

*E-mail:* [jhlu@njau.edu.cn](mailto:jhlu@njau.edu.cn)

Number of pages (including this page): 3

Number of figures: 2

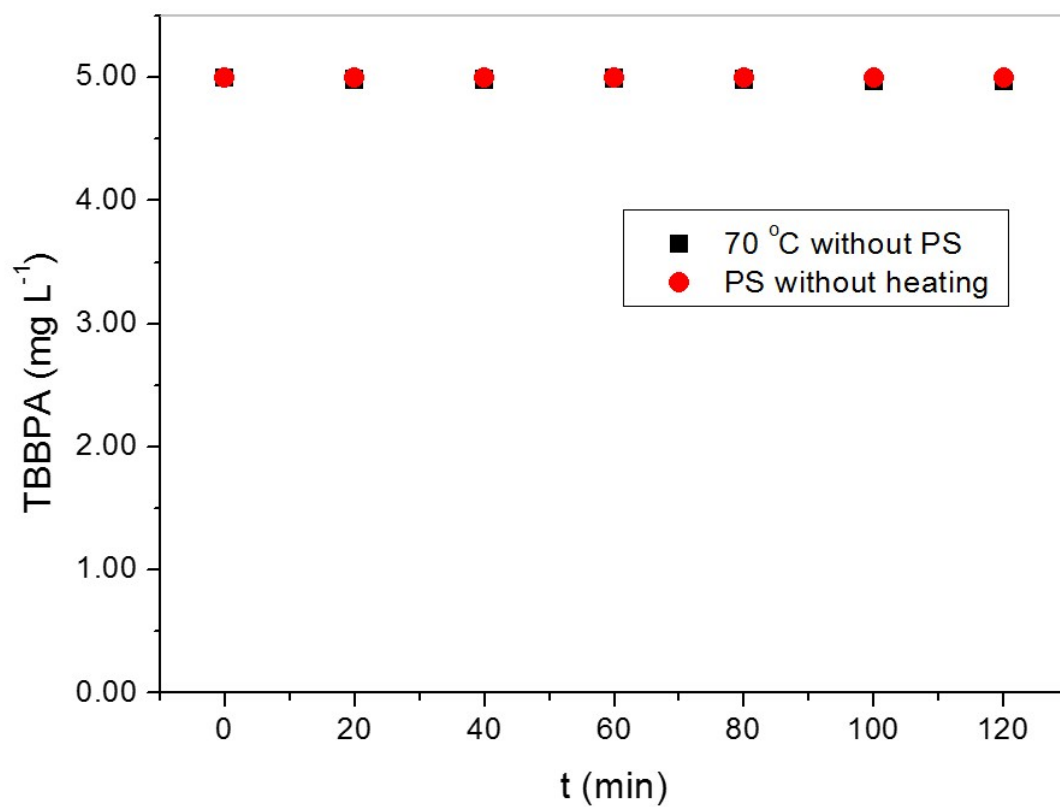

**Fig. S1** Degradation of TBBPA subjected to heating (70 °C) and PS without heating A. Experimental conditions: [TBBPA] = 5 mg L<sup>-1</sup>, [S<sub>2</sub>O<sub>8</sub><sup>2-</sup>] = 1.0 mM, pH = 8.0.

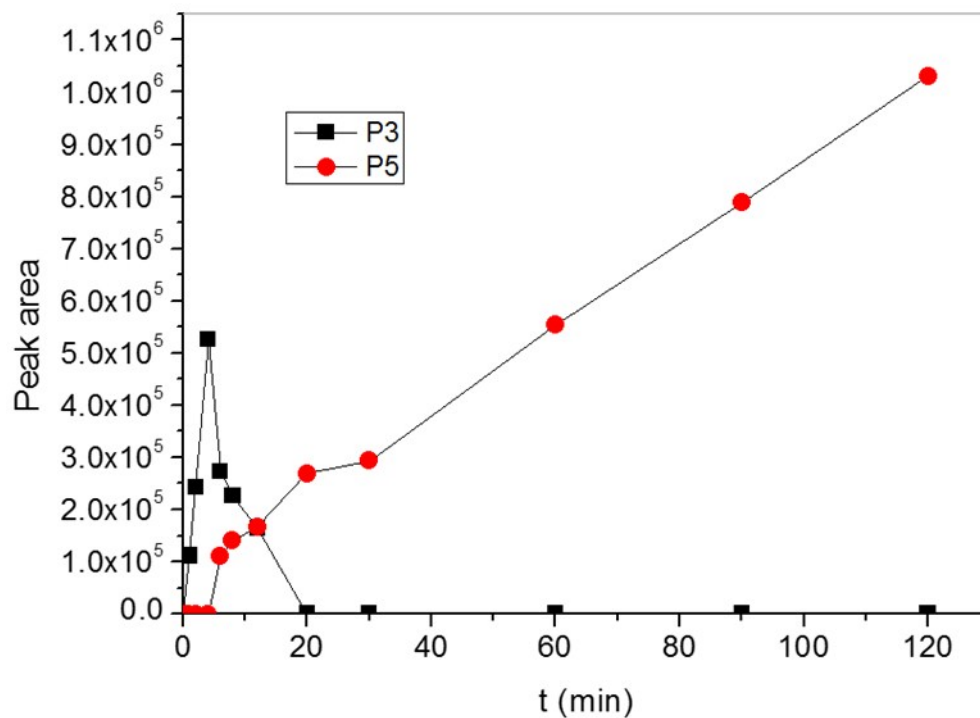

**Fig. S2** Time-dependent evolution 4-isopropylene-2,6-dibromophenol (P3) and 4-isopropyl-2,6-dibromophenol (P5). Experimental conditions: [TBBPA] = 5 mg L<sup>-1</sup>, [S<sub>2</sub>O<sub>8</sub><sup>2-</sup>] = 0.4 mM, temperature = 50 °C, pH = 8.0.
